# Supplementary material
Source: PubMed Central journal article supplement (PMC6292790)
Supplement: djy128_supp.pdf [file djy128_supp.pdf]

## **Supplementary Material**

Effects of Radiotherapy in Early-Stage, Low-Recurrence Risk, Hormone-Sensitive Breast Cancer

## Supplementary Methods

### **Clinico-pathological Estimation of Oncotype DX® Scores**

The Oncotype DX® Recurrence Score is to date the most well-established and well-studied risk assessment tool available. It is widely and routinely used in the United States to make clinical determinations regarding the use of adjuvant systemic chemotherapy in hormone receptor-positive, node-negative patients with early stage disease.

Breast cancer clinicopathological features can be used to guide treatment based on prognosis. Gene-expression profile tests like Oncotype DX® provide information that is complementary to these clinical features,(1) and have been validated to predict loco-regional and distant breast cancer recurrences.(2, 3) Use of combinations of patient, tumor, and gene-expression profile test results has better prognostic ability than any source individually.(1, 4) Consequently, many modern clinical trials include Oncotype DX® and other clinicopathological factors in eligibility criteria and/or analyses. Unfortunately, since many older clinical trials do not have Oncotype DX® data, it is difficult to conduct meta-analyses or modeling of potential trials examining treatment effects and interactions of Oncotype DX® scores with treatment results.

We collaborated with the NCI Breast Oncology and Local Disease (BOLD) Committee to simulate a proposed trial evaluating the impact of omitting radiotherapy on recurrence and survival endpoints among biologically low recurrence-risk patients. The research included two specific-aims:

- 1) Conduct a pooled analysis of past trials considering Oncotype DX®, and
- 2) Simulate the proposed trial.

To complete these aims, we used individual, de-identified data from seven clinical trials to examine the effects of radiotherapy on recurrence events among patients with stage I, hormone receptor positive, HER2- tumors with Oncotype DX® scores  $\leq 18$ . Since Oncotype DX® data were missing from six of the seven trials, we developed and evaluated a method to impute missing Oncotype DX® scores and determine the effect of radiation among low risk breast cancer patients. The algorithm and methods used to impute Oncotype DX® scores are intended for use in analyses of effects and endpoints at a cohort-level, and are not applicable for predicting outcomes of individual patients. We assumed that the Oncotype DX® scores in the six trials were missing at random (MAR), where the probability that data are missing does not depend on unobserved data but may depend on observed characteristics.(5)

The Oncotype DX® score imputation was based on the distribution of Oncotype DX® scores in the population-based linked Surveillance, Epidemiology, and End Results-Genomic Health Inc. (SEER-GHI) registry, and a deterministic regression-based multiple imputation approach.(6-9) We also obtained a separate proprietary clinical trial dataset from Genomic Health Inc. with Oncotype DX® scores (NSABP-GHI data).(3) This proprietary dataset was not included in the pooled clinical trial dataset. It was only used for external validation of the Oncotype DX® score imputation model.

The statistical technique we employed to impute Oncotype DX® scores was based on the associations between Oncotype DX® scores, age, radiation and clinicopathological features of breast

cancer patients.(1, 4) First, we combined the SEER-GHI data set (with non-missing Oncotype DX scores) with the pooled clinical trial dataset and compared the distribution of observed characteristics between the SEER-GHI and pooled clinical trial data (Supplementary Table 2). The distribution of characteristics was approximately similar. In both datasets majority of the patients had ER+ and PR+ breast cancer and good/intermediate grade tumors with an average tumor size of around 1 cm. Women recruited for clinical trials were somewhat younger than the women in the population-based SEER-GHI dataset.

Next, we fitted a negative binomial generalized linear model for Oncotype DX® scores conditional on age, tumor size, tumor grade, ER/PR status, radiation and HER2 status (negative vs. missing/unknown) among women diagnosed with Stage I, hormone receptor positive (ER+ and/or PR+), HER2 negative (or unknown), node negative breast cancer (pathologically determined) who have undergone breast conserving surgery. We examined the goodness-of-fit of this imputation model by calculating deviance residuals as recommended by McCullagh and Nelder (1989).(10) Deviance residuals should be approximately normally distributed if the model is correct. As shown in Supplementary Figure 1, the deviance residuals were approximately normally distributed indicating that the model fit is correct.

We employed a simulation-based procedure,(7) to impute Oncotype DX® scores multiple (50) times to each woman based on the imputation model. This dataset was analyzed using STATA version 14 ‘*mi estimate*’ command, which adjusts coefficients and standard errors for variability between imputations according to the combination rules outlined by Rubin (1987).(8) We randomly selected a sample and compared the distribution of the imputed Oncotype DX® scores with actual scores in SEER-GHI data. The distribution of the imputed scores in the clinical dataset and actual scores in the SEER-GHI dataset were similar among patients with stage I, ER+ and/or PR+, HER2-breast cancer who have undergone breast conserving surgery (Supplementary Table 3). Hence, we infer that the Oncotype DX® score imputation provides good cohort-level predictive validity.

Since the proposed trial eligibility only included Oncotype DX® scores of 18 or less, we used an estimation method that allowed the estimation sample to vary across imputations. We examined the variance information, including within-imputation and between-imputation variances, increase in relative variance due to missing data, fraction of missing information (FMI) (i.e. the ratio of information lost due to the missing data to the total information that would be present if there were no missing data) and relative efficiencies for using 50 imputations versus the theoretically optimal infinite number of imputations. Within-imputation and between-imputation variances for radiation were small (0.08 and 0.03 respectively), the relative variance increase due to missing data was 0.4, FMI was 0.3, and relative efficiency was one. FMI for Oncotype DX® score (45%) was less than the percentage of overall missing data in the pooled data set (66%) indicating that the imputation could reduce bias due to missing data, and handle missing information to provide reasonable statistical inference.

## ***Imputation Validation***

The imputation model developed for Oncotype DX<sup>®</sup> scores was evaluated using both a split-sample and an external validation. For the split sample validation, the SEER-GHI linked dataset with non-missing recurrence scores was randomly split into a derivation sample (N=13,569) and a validation sample (N=13,464). The derivation sample was used to fit a generalized linear model for Oncotype DX<sup>®</sup> scores conditional upon age, ER/PR status, HER2 status, radiation, tumor size, and tumor grade as described above. Oncotype DX<sup>®</sup> scores in the validation sample were estimated using the coefficients derived from the derivation sample. Summary statistics and histograms were used to compare the distributions of the clinicopathologically estimated and actual Oncotype DX<sup>®</sup> scores in the SEER-GHI validation sample (Supplementary Table 4). The summary statistics and histograms illustrate the similarities in the estimated and actual Oncotype DX<sup>®</sup> scores at the population-level.

For external validation of the algorithm used to impute Oncotype DX<sup>®</sup> scores in clinical trial data, we applied the model developed in SEER-GHI data (a population-based registry) to the proprietary NSABP-GHI clinical trial dataset and evaluated the concordance between the predicted and actual Oncotype DX<sup>®</sup> scores in NSABP-GHI clinical trial data using Pearson's correlation coefficient and Kappa statistic. The Pearson correlation coefficient between the estimated and actual scores in the NSABP-GHI data was high ( $r=.70$ ,  $p<.001$ ). The concordance between the two scores for score categories was also very good ( $\kappa=.71$ ) (Supplementary Table 5). These statistics indicate good overall concordance. As shown in Supplementary Table 5, among patients with actual Oncotype DX<sup>®</sup> scores in the 0-18 category, 71% women have a predicted score in this same score category; prediction was slightly lower in the 19+ category.

Finally, while the purpose of the Oncotype DX<sup>®</sup> score estimation was to match the overall distribution of Oncotype DX<sup>®</sup> values, rather than match actual individual scores to predicted scores based on individual patient characteristics, we plotted the predicted vs. actual individual values for the NSABP-GHI dataset (Supplementary Figure 2). The results show that there is a moderately strong positive linear relationship between predicted and actual Oncotype DX<sup>®</sup> scores in the NSABP-GHI clinical trial data.

## ***Caveats***

The Oncotype DX<sup>®</sup> score imputation assumes that differences in the distribution of missing Oncotype DX<sup>®</sup> scores in the pooled clinical trial data given the Oncotype DX<sup>®</sup> information in SEER-GHI and the observed covariates in both datasets were ignorable. The similarities in the distribution of observed characteristics support the choice of imputation model and the 'missing at random' assumption implicit in the model. However, we acknowledge that there may be systematic differences between women receiving vs. not receiving the Oncotype DX<sup>®</sup> test in SEER-GHI compared to those included in clinical trials. Therefore, while the imputation was robust, and there were similarities in the distribution of observed characteristics, it may have not removed all bias due to missing data. Women receiving Oncotype DX<sup>®</sup> testing in

SEER-GHI data would include mostly women with low and intermediate risk scores.(6, 9) Since women in the NSABP trials were selected to participate in the trials without knowledge of Oncotype DX<sup>®</sup>, they may have had higher or lower scores than the source population from which they were drawn. Hence, it is not possible to infer the impact of the Oncotype DX<sup>®</sup> score imputation on misclassification and bias towards or away from the null. The imputed scores are useful to determine robust trial-wide endpoints (and their uncertainty).

### ***Conclusions***

Clinicopathologically estimated Oncotype DX<sup>®</sup> scores reproduce population-level distributions, and can be considered for use to evaluate trial endpoints at the cohort-level that are conditional on Oncotype DX<sup>®</sup> scores.

## **Propensity Score Analyses (11)**

### ***Model equation for the logistic regression (for the propensity score estimation)***

$$\ln(o) = \ln\left(\frac{p}{1-p}\right) = \beta_0 + \beta (\text{Age Categories}) + \lambda (\text{Grade}) + \rho (\text{Radiation randomized}) + \pi (\text{ER/PR status}) + \Psi (\text{tumor size}) + \alpha (\text{predicted oncototype score}) + \Omega_1 (\text{tumor size * radiation randomized}) + \Omega_2 (\text{age * radiation randomized}) + \Omega_3 (\text{grade * radiation randomized}) + \Omega_4 (\text{ER + PR + status * radiation randomized}) + \varepsilon$$

$o$  = odds of receiving radiation,

$p$  = proportion of women receiving radiation in the sample,

$\beta_0$  = the intercept,

$\beta$  to  $\mu$  = represents the coefficients (slopes) of each variable belonging to the categories shown in the table below.  $\beta, \lambda, \rho, \pi, \Psi, \alpha$ , and  $\Omega_1$  to 4 are coefficients associated with the variables belonging to each category provided in the table below.

$\varepsilon$  = random error

### ***Multivariable logistic regression model used for the propensity score estimation***

| Variables                                    | Point Estimate<br>(Odds Ratio) | SE        | p-value |
|----------------------------------------------|--------------------------------|-----------|---------|
| <b>Demographics</b>                          |                                |           |         |
| Age at randomization                         | 0.99                           | 0.02      | 0.38    |
| <b>Clinical Characteristics (Baseline)</b>   |                                |           |         |
| Grade                                        |                                |           |         |
| Good                                         | 0.08                           | 0.06      | 0.00    |
| Intermediate/ Poor                           | 0.10                           | 0.07      | 0.00    |
| Unknown                                      |                                | Reference |         |
| ER/PR status                                 |                                |           |         |
| ER+/PR+                                      | 0.18                           | 0.18      | 0.09    |
| Other                                        |                                | Reference |         |
| Tumor size                                   | 2.10                           | 0.77      | 0.04    |
| <b>Radiation Randomized</b>                  | 0.07                           | 0.08      | 0.02    |
| <b>Interactions</b>                          |                                |           |         |
| Tumor size*radiation randomized              | 0.43                           | 0.17      | 0.03    |
| Age*radiation randomized                     | 1.01                           | 0.02      | 0.51    |
| Good grade*radiation randomized              | 11.12                          | 8.59      | 0.00    |
| Intermediate/Poor grade*radiation randomized | 9.17                           | 6.86      | 0.00    |
| ER+/PR+*radiation randomized                 | 6.11                           | 6.27      | 0.08    |
| <b>c- statistic</b>                          |                                | 0.83      |         |
| <b>Hosmer and Lemeshow Test</b>              |                                |           |         |
| Hosmer-Lemeshow Chi-Square                   |                                | 5.26      |         |
| Degrees of freedom                           |                                | 8         |         |
| p-value                                      |                                | 0.73      |         |

***Balance Diagnostics: Comparison of individual characteristics and standardized differences in the weighted sample***

|                                | <b>Radiation<br/>Therapy<br/>(N<sup>b</sup>=1,817)</b> | <b>No Radiation<br/>Therapy<br/>(N<sup>b</sup>=573)</b> | <b>p-value<sup>c</sup></b> | <b>Std. Diff.<br/>(%)</b> |
|--------------------------------|--------------------------------------------------------|---------------------------------------------------------|----------------------------|---------------------------|
|                                | <b>Mean, %<sup>a</sup></b>                             | <b>Mean, %<sup>a</sup></b>                              |                            |                           |
| Age at randomization (years)   | 58                                                     | 55                                                      | -                          | -                         |
| Grade                          |                                                        |                                                         |                            |                           |
| Good                           | 31%                                                    | 37%                                                     | 0.43                       | -12.6                     |
| Intermediate/ Poor             | 67%                                                    | 59%                                                     | 0.32                       | 15.4                      |
| Unknown                        | 2%                                                     | 4%                                                      | 0.59                       | -8.9                      |
| ER/PR status                   |                                                        |                                                         |                            |                           |
| ER+/PR+                        | 95%                                                    | 97%                                                     | 0.29                       | -14.6                     |
| HER2 negative                  | 100%                                                   | 100%                                                    | 1.00                       | 0.0                       |
| Tumor size                     | 1.4                                                    | 1.3                                                     | 0.27                       | 13.4                      |
| Oncotype DX <sup>®</sup> score | 7.0                                                    | 7.3                                                     | 0.60                       | 7.7                       |

- % is calculated as the ratio of the frequency count for a single cell to the total count for the column that contains the cell in the weighted sample. The ratio is presented as a percentage. Age, tumor size and predicted Oncotype DX<sup>®</sup> scores represented weighted means.
- N represents the number of total observations in each group.
- F-test (or chi-square test, for categorical variables) for the significance of the difference between treated and untreated subjects

## Supplementary Tables

**Table 1.** Summary of Trials Included in the Analyses

| Study                           | Years of randomization                                             | Country | N     | Age                                                               | Trial eligibility                                                                                                                                                                                                                                                                                                                                                                                                                            | Comparators                                 | Study End Points                                                                                                                                             | Trial Design                   | Median Length of Follow-up (range) (years) | RT randomized |
|---------------------------------|--------------------------------------------------------------------|---------|-------|-------------------------------------------------------------------|----------------------------------------------------------------------------------------------------------------------------------------------------------------------------------------------------------------------------------------------------------------------------------------------------------------------------------------------------------------------------------------------------------------------------------------------|---------------------------------------------|--------------------------------------------------------------------------------------------------------------------------------------------------------------|--------------------------------|--------------------------------------------|---------------|
| CALGB 9343(12, 13)              | July 1994 and February 1999                                        | US      | 636   | ≥70 years                                                         | Women with clinical stage I, ER-positive breast cancer (97%). Initial eligibility criteria included breast cancers up to 4 cm regardless of estrogen receptor status, but this was reduced in August 1996 to ≤2 cm (T1) with ER-positive or indeterminate receptor status. Patients were required to have clinically negative axillae.                                                                                                       | Tamoxifen<br>RT + tamoxifen                 | Time to loco-regional recurrence, frequency of mastectomy for recurrence, breast cancer-specific survival, time to distant metastasis, and overall survival. | RCT                            | 10.3 (0.1 to 16)                           | Yes           |
| NSABP B-21(14)                  | June 1, 1989-April 6, 1994, and April 1, 1996, - December 31, 1998 | US      | 1,009 | 32-82 years (Approximately 80% of the women were aged ≥50 years.) | Women had primary invasive pathological breast tumor size of <1 cm (if the pathologic size of a tumor was not available, both the clinical and mammographic sizes of the tumor had to be less than 1 cm). All tumors had to have been removed by lumpectomy and axillary dissection, margins of the resected specimen had to be tumor-free on pathologic examination, and axillary lymph nodes had to be negative on histologic examination. | Tamoxifen<br>RT + placebo<br>RT + tamoxifen | Rate of ipsilateral breast tumor recurrence and both systemic recurrence (local, regional and distant) and contralateral breast cancer.                      | RCT                            | 12.7 (0 to 18)                             | Yes           |
| Toronto/Vancouver Hospital (15) | December 1992 and June 2000                                        | Canada  | 769   | ≥50 years                                                         | Women who had undergone breast-conserving surgery (BCS) for an invasive adenocarcinoma 5 cm or less in diameter (pathological stage T1 or T2).                                                                                                                                                                                                                                                                                               | Tamoxifen<br>RT + tamoxifen                 | Time from randomization to the first treatment failure in ipsilateral breast, in the axillary nodes, or at a distant site) or death (with no recurrence).    | RCT                            | 9.7 (0 to 18)                              | Yes           |
| GBSG V (16)                     | 1991 and 1998                                                      | Germany | 347   | 45-75 years                                                       | Women with primary breast cancer, stage pT 1pN0M0, histological                                                                                                                                                                                                                                                                                                                                                                              | BCS without any further treatment, BCS      | Event-free survival defined as the time from primary diagnosis to the first event of                                                                         | 2X2-factorial design with four | 9.1 (0.3 to 16)                            | Yes           |

| Study          | Years of randomization                 | Country | N     | Age         | Trial eligibility                                                                                                                                                                                                                                                                                                | Comparators                                                                                                         | Study End Points                                                                                                                                                                                                                                                                                                                                | Trial Design                           | Median Length of Follow-up (range) (years) | RT randomized                                                                           |
|----------------|----------------------------------------|---------|-------|-------------|------------------------------------------------------------------------------------------------------------------------------------------------------------------------------------------------------------------------------------------------------------------------------------------------------------------|---------------------------------------------------------------------------------------------------------------------|-------------------------------------------------------------------------------------------------------------------------------------------------------------------------------------------------------------------------------------------------------------------------------------------------------------------------------------------------|----------------------------------------|--------------------------------------------|-----------------------------------------------------------------------------------------|
|                |                                        |         |       |             | tumor grades I or II according, absence of lymphovascular invasion tumor-free margins (at least 2 mm) after BCS, no extensive intraductal component (EIC), positive estrogen and/or progesterone receptor status.                                                                                                | + RT, BCS + TAM and BCS + RT + TAM.                                                                                 | local or regional recurrence without simultaneous distant failure or distant recurrence, contralateral or second cancer and death without previous recurrence. Distant disease-free survival defined as the time from primary diagnosis to distant recurrence, contralateral or second cancer and/or death without previous distant recurrence. | treatment arms.                        |                                            |                                                                                         |
| TAILORx (17)   | April 7, 2006, and October 6, 2010     | US      | 1,629 | 18-75 years | Women with axillary node–negative invasive breast cancer that was estrogen-receptor–positive or progesterone-receptor–positive (or both) and that did not overexpress HER2 and a recurrence score of 0 to 10 (indicating low risk).                                                                              | Patients were assigned to receive endocrine therapy without chemotherapy if they had a recurrence score of 0 to 10. | Rate of survival free from first event of recurrence of ipsilateral breast tumor, local/regional/distant recurrence, second primary cancer or death without evidence of recurrence.                                                                                                                                                             | prospectively conducted clinical trial | 5 (0 to 5)                                 | No: among those who underwent lumpectomy 92% received radiation therapy.                |
| NSABP B-14(18) | January 4, 1982, and December 15, 1987 | US      | 2,892 | ≤70 years   | Women with operable primary breast cancer and axillary nodes negative for cancer at histologic examination were eligible for this study if their tumors were estrogen-receptor positive (≥10 fmol) and they fulfilled specific criteria common to all NSABP clinical trials evaluating systemic therapy.(19, 20) | Tamoxifen only<br>Placebo                                                                                           | Disease-free survival included first local recurrences of disease, regional and distant metastases, recurrence of tumor in the ipsilateral breast after lumpectomy, occurrence of tumor in the contralateral breast, occurrence of a second primary tumor, and death due to causes other than cancer.                                           | RCT                                    | 18.5 (0 to 25)                             | No: per protocol RT required after BCS<br>We assumed 100% compliance with protocol.     |
| NSABP B-20(19) | October 17, 1988, and March 5, 1993    | US      | 2,363 | 21-75 years | Women who had primary operable, histologically node-negative, ER-positive breast cancer and who had a life expectancy of at least 10 years were eligible for this study.                                                                                                                                         | Tamoxifen<br>ONLY<br>MF+<br>Tamoxifen<br>CMF+<br>Tamoxifen                                                          | Disease-free survival was defined as time on the study without recurrence of breast cancer at local, regional, or distant sites; occurrence of a second primary cancer; or occurrence of death prior to those events.                                                                                                                           | RCT                                    | 14 (0 to 17)                               | No: per protocol RT required after BCS<br><br>We assumed 100% compliance with protocol. |

**Table 2.** Comparison of patient characteristics

| <b>Characteristics</b> | <b>Pooled Clinical<br/>Trial Data<br/>(%)<br/>N=4,249</b> | <b>SEER-GHI<br/>(%)<br/>N= 27,033</b> |
|------------------------|-----------------------------------------------------------|---------------------------------------|
| Grade <sup>1</sup>     |                                                           |                                       |
| Good                   | 29.4                                                      | 30.8                                  |
| Intermediate           | 50.4                                                      | 51.9                                  |
| Poor                   | 12.9                                                      | 14.6                                  |
| Unknown/Missing        | 7.4                                                       | 2.7                                   |
| Tumor size (cm)        | Mean 1.2 (SD 0.5)                                         | 1.3 (0.4)                             |
| Hormone status         |                                                           |                                       |
| ER+ and PR+            | 72.7                                                      | 89.3                                  |
| Other                  | 27.3                                                      | 10.7                                  |
| Age (years)            |                                                           |                                       |
| <60                    | 48.4                                                      | 40.0                                  |
| 60-70                  | 29.0                                                      | 38.0                                  |
| 70+                    | 22.6                                                      | 21.0                                  |
| Radiation              |                                                           |                                       |
| Yes                    | 78.8                                                      | 85.0                                  |
| No                     | 21.2                                                      | 15.0                                  |

---

<sup>1</sup> Trials providing grade information

**Table 3.** Comparison of distributions of imputed and actual Oncotype DX® scores

|                    | <b>Imputed Oncotype DX® scores in pooled clinical trial data</b>                                                                                                                                                                                                                                                                                                                                                             | <b>Actual Oncotype DX® scores in SEER-GHI</b>                                                                                                                                                                                                                                                                                                                                                                               |
|--------------------|------------------------------------------------------------------------------------------------------------------------------------------------------------------------------------------------------------------------------------------------------------------------------------------------------------------------------------------------------------------------------------------------------------------------------|-----------------------------------------------------------------------------------------------------------------------------------------------------------------------------------------------------------------------------------------------------------------------------------------------------------------------------------------------------------------------------------------------------------------------------|
| N                  | 4,249                                                                                                                                                                                                                                                                                                                                                                                                                        | 27,033                                                                                                                                                                                                                                                                                                                                                                                                                      |
| Mean               | 17.4                                                                                                                                                                                                                                                                                                                                                                                                                         | 17.4                                                                                                                                                                                                                                                                                                                                                                                                                        |
| Median             | 16.0                                                                                                                                                                                                                                                                                                                                                                                                                         | 17.0                                                                                                                                                                                                                                                                                                                                                                                                                        |
| Standard Deviation | 8.0                                                                                                                                                                                                                                                                                                                                                                                                                          | 8.3                                                                                                                                                                                                                                                                                                                                                                                                                         |
| Histogram          | 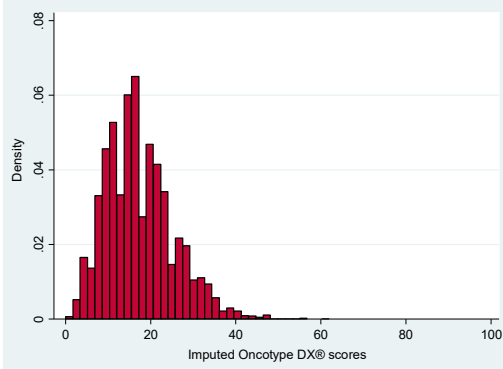 <p>A histogram showing the density of imputed Oncotype DX® scores. The x-axis is labeled 'Imputed Oncotype DX® scores' and ranges from 0 to 100. The y-axis is labeled 'Density' and ranges from 0 to 0.08. The distribution is unimodal and slightly right-skewed, with a peak density of approximately 0.065 at a score of about 18.</p> | 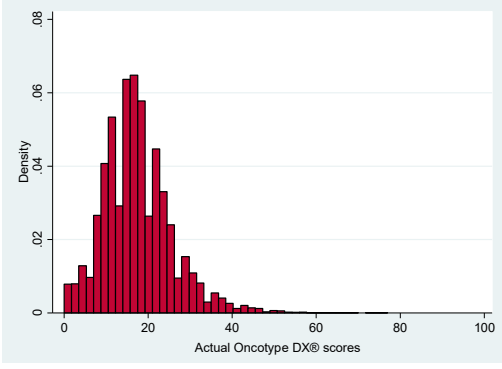 <p>A histogram showing the density of actual Oncotype DX® scores. The x-axis is labeled 'Actual Oncotype DX® scores' and ranges from 0 to 100. The y-axis is labeled 'Density' and ranges from 0 to 0.08. The distribution is unimodal and slightly right-skewed, with a peak density of approximately 0.065 at a score of about 18.</p> |

**Table 4.** Distribution of Oncotype DX<sup>®</sup> scores in the Validation Sample

|                    | Clinicopathologically estimated Oncotype DX <sup>®</sup> scores in SEER-GHI in Validation Sample | Observed Oncotype DX <sup>®</sup> scores in SEER-GHI in Validation Sample          |
|--------------------|--------------------------------------------------------------------------------------------------|------------------------------------------------------------------------------------|
| N                  | 13,464                                                                                           | 13,464                                                                             |
| Mean               | 17.3                                                                                             | 17.4                                                                               |
| Median             | 16.0                                                                                             | 17.0                                                                               |
| Standard Deviation | 7.9                                                                                              | 8.3                                                                                |
| Histogram          | 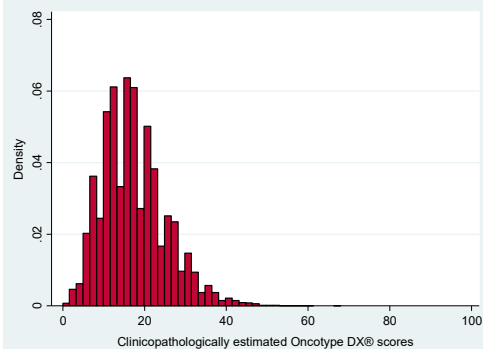                | 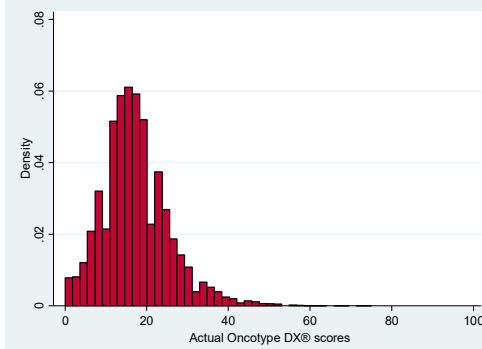 |

**Table 5.** Comparison of actual vs. predicted Oncotype DX<sup>®</sup> scores by Oncotype DX<sup>®</sup> 0-18 and 19+ categories (NSABP-GHI data for stage I, node negative and ER+ and/or PR+ breast cancer)

| Predicted Oncotype DX <sup>®</sup> scores (N, row %) | Actual Oncotype DX <sup>®</sup> scores (N, row %) |             |              |
|------------------------------------------------------|---------------------------------------------------|-------------|--------------|
|                                                      | 0-18                                              | 19+         | Total        |
| 0-18                                                 | 535 (71.1%)                                       | 217 (28.9%) | 752 (100%)   |
| 19+                                                  | 153 (30.2%)                                       | 353 (69.8%) | 506 (100%)   |
| Total                                                | 688 (54.7%)                                       | 570 (45.3%) | 1,258 (100%) |
| Kappa Statistic                                      | 71%                                               |             |              |

**Table 6.** Characteristics of Patients by Study (N=1,778)

| Characteristics                                     | Trial            |                          |                  |                                         |                     |                  |                  |                   |
|-----------------------------------------------------|------------------|--------------------------|------------------|-----------------------------------------|---------------------|------------------|------------------|-------------------|
|                                                     | B-21<br>(N= 217) | CALGB<br>9343<br>(N=135) | GBSG V<br>(N=88) | Toronto/<br>Vancouver Trial<br>(N= 177) | TAILORx<br>(N= 809) | B-14<br>(N= 208) | B-20<br>(N= 145) | TOTAL<br>(N=1778) |
|                                                     | Col. %           | Col. %                   | Col. %           | Col. %                                  | Col. %              | Col. %           | Col. %           | Col. %            |
| Age at randomization                                |                  |                          |                  |                                         |                     |                  |                  |                   |
| 40-49 years                                         | 15.0             | 0                        | 9.8              | 0                                       | 19.4                | 26.5             | 39.0             | 17.4              |
| 50-59 years                                         | 34.2             | 0                        | 37.3             | 28.1                                    | 38.8                | 34.8             | 35.0             | 33.4              |
| 60-69 years                                         | 34.7             | 0                        | 35.2             | 40.7                                    | 36.0                | 36.9             | 23.1             | 32.6              |
| 70-74 years                                         | 16.1             | 100                      | 17.8             | 31.2                                    | 5.8                 | 1.8              | 2.9              | 16.6              |
| Age at randomization (years)<br>(mean and SD)       | 60 (8.5)         | 72 (1.2)                 | 61 (8)           | 64 (7)                                  | 57 (8)              | 56 (8)           | 53 (8)           | 59 (9)            |
| Tumor Grade                                         |                  |                          |                  |                                         |                     |                  |                  |                   |
| Low                                                 | 40.2             | NA <sup>2</sup>          | 43.0             | 14.8                                    | 31.9                | NA               | 20.7             | 24.7              |
| Intermediate                                        | 37.5             | NA                       | 53.5             | 55.3                                    | 58.7                | NA               | 43.9             | 43.0              |
| High                                                | 10.6             | NA                       | 3.5              | 25.1                                    | 6.8                 | NA               | 21.7             | 8.8               |
| Missing/Unknown                                     | 11.7             | 100                      | 0                | 4.9                                     | 2.6                 | 100              | 13.7             | 23.5              |
| Pathological tumor size                             |                  |                          |                  |                                         |                     |                  |                  |                   |
| ≤ 1 cm                                              | 97.6             | 0                        | 0                | 38.5                                    | 17.4                | 28.5             | 26.5             | 29.1              |
| >1-2 cm                                             | 0                | 0                        | 0                | 61.5                                    | 82.6                | 60.1             | 71.0             | 56.5              |
| Unknown (but ≤ 2 cm<br>per study protocol)          | 2.44             | 100                      | 100              | 0                                       | 0                   | 11.4             | 2.6              | 14.4              |
| Tumor size (pathological, clinical or mammographic) |                  |                          |                  |                                         |                     |                  |                  |                   |
| ≤ 1 cm                                              | 100              | 57.5                     | 25.8             | 38.5                                    | 17.4                | 33.3             | 26.9             | 35.7              |
| >1 cm                                               | 0                | 42.5                     | 74.2             | 61.5                                    | 82.6                | 66.7             | 73.1             | 64.3              |
| Endocrine therapy                                   |                  |                          |                  |                                         |                     |                  |                  |                   |
| Tamoxifen                                           | 100              | 100                      | 100              | 100                                     | 21.8                | 100              | 100              | 64.4              |
| Aromatase Inhibitor (AI)                            | 0                | 0                        | 0                | 0                                       | 53.65               | 0                | 0                | 24.4              |
| AI/Tamoxifen                                        | 0                | 0                        | 0                | 0                                       | 19.9                | 0                | 0                | 9.1               |

<sup>2</sup> Information not provided in the trial

| Characteristics                                                         | Trial            |                          |                  |                                         |                     |                  |                  |                   |
|-------------------------------------------------------------------------|------------------|--------------------------|------------------|-----------------------------------------|---------------------|------------------|------------------|-------------------|
|                                                                         | B-21<br>(N= 217) | CALGB<br>9343<br>(N=135) | GBSG V<br>(N=88) | Toronto/<br>Vancouver Trial<br>(N= 177) | TAILORx<br>(N= 809) | B-14<br>(N= 208) | B-20<br>(N= 145) | TOTAL<br>(N=1778) |
|                                                                         | Col. %           | Col. %                   | Col. %           | Col. %                                  | Col. %              | Col. %           | Col. %           | Col. %            |
| Ovarian Function<br>Suppression (with or<br>without AI/Tam)             | 0                | 0                        | 0                | 0                                       | 4.7                 | 0                | 0                | 2.1               |
| Radiation randomized                                                    |                  |                          |                  |                                         |                     |                  |                  |                   |
| Yes                                                                     | 100              | 100                      | 100              | 100                                     | 0                   | 0                | 0                | 34.7              |
| No                                                                      | 0                | 0                        | 0                | 0                                       | 100                 | 100              | 100              | 65.3              |
| Any first event <sup>3</sup>                                            | 9.5              | 10.3                     | 9.7              | 9.9                                     | 1.0                 | 11.3             | 9.0              | 5.1               |
| 5-year RFI rates                                                        | 94.8             | 94.1                     | 92.3             | 93.3                                    | 98.9                | 92.9             | 96.2             | 94.6              |
| Time to any first event<br>(median and SD) (in years)                   | 10 (2)           | 10 (3)                   | 9 (3)            | 10 (3)                                  | 5 (1)               | 10 (2)           | 10 (2)           | 5 (3)             |
| Length of follow-up (median<br>and SD) (in years)                       | 11 (3)           | 11 (3)                   | 9 (3)            | 10 (4)                                  | 5 (1)               | 19 (6)           | 14 (3)           | 5 (5)             |
| Type of first event                                                     |                  |                          |                  |                                         |                     |                  |                  |                   |
| Local-regional<br>recurrence                                            | 7.7              | 8.1                      | 8.2              | 6.8                                     | 0.6                 | 3.7              | 5.9              | 3.8               |
| Distant recurrence                                                      | 1.7              | 2.2                      | 1.6              | 3.2                                     | 0.4                 | 7.6              | 2.7              | 2.1               |
| Breast cancer death                                                     | 0.0              | 0.0                      | 0.0              | 0.0                                     | 0.0                 | 0.0              | 0.4              | 0.0               |
| Censored (alive at the end of<br>study or death due to other<br>causes) | 90.5             | 89.7                     | 90.3             | 90.1                                    | 99.0                | 88.7             | 91.0             | 94.1              |
| Predicted Risk group                                                    |                  |                          |                  |                                         |                     |                  |                  |                   |
| 0-10                                                                    | 31.2             | 34.1                     | 32.7             | 31.4                                    | 100.0               | 32.1             | 32.2             | 63.0              |
| 11-18                                                                   | 68.8             | 65.9                     | 67.3             | 68.6                                    | 0.0                 | 67.9             | 67.8             | 37.0              |

<sup>3</sup> First occurrence of local (invasive), regional or distant recurrence or death due to breast cancer

## Supplementary Figures

**Figure 1.** Goodness of fit statistics for the Generalized Linear Model Used to Estimate Oncotype DX® Scores

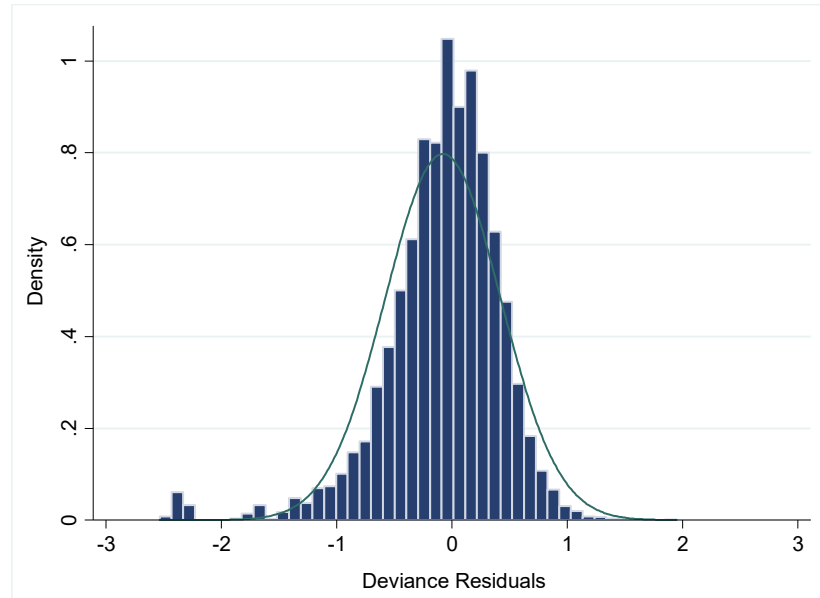

Skewness=-0.07, Kurtosis=6.0, Shapiro-Wilk test= two-sided p-value<0.001 (z-test)

**Figure 2.** Scatter Plot of Actual vs. Predicted Oncotype DX® scores in the NSABP-GHI Data (node negative and ER+ and/or PR+ breast cancer)

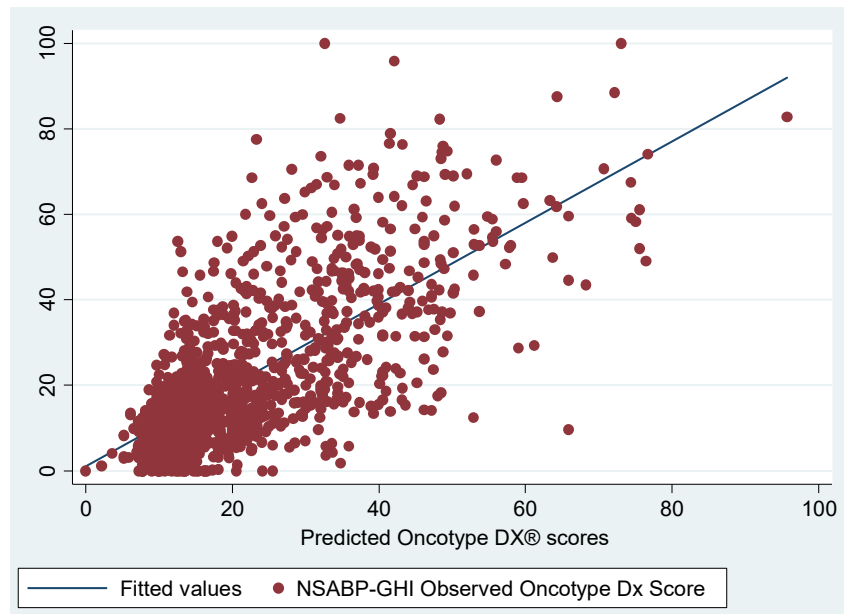

## References

1. U.S. Bureau of Labor Statistics. May 2016 National Occupational Employment and Wage Estimates United States. Washington, DC: U.S. Bureau of Labor Statistics. Occupational Employment Statistics. March 2017.  
[https://www.bls.gov/oes/2016/may/oes\\_nat.htm](https://www.bls.gov/oes/2016/may/oes_nat.htm) Accessed December 18, 2017. In.
2. Mamounas EP, Tang G, Fisher B, *et al.* Association Between the 21-Gene Recurrence Score Assay and Risk of Locoregional Recurrence in Node-Negative, Estrogen Receptor–Positive Breast Cancer: Results From NSABP B-14 and NSABP B-20. *Journal of Clinical Oncology* 2010;28(10):1677-1683.
3. Paik S, Shak S, Tang G, *et al.* A multigene assay to predict recurrence of tamoxifen-treated, node-negative breast cancer. *N Engl J Med* 2004;351(27):2817-26.
4. Red Book Online. Greenwood Village, CO: Truven Health Analytics Inc. 2015.
5. Little RJ, Rubin DB. *Statistical analysis with missing data*: John Wiley & Sons; 2014.
6. Petkov VI, Miller DP, Howlander N, *et al.* Breast-cancer-specific mortality in patients treated based on the 21-gene assay: a SEER population-based study. *Npj Breast Cancer* 2016;2:16017.
7. Maciosek MV, Xu X, Butani AL, *et al.* Smoking-attributable medical expenditures by age, sex, and smoking status estimated using a relative risk approach. *Prev Med* 2015;77:162-7.
8. Rubin DB. *Multiple imputation for nonresponse in surveys*: John Wiley & Sons; 2004.
9. Mahadevia PJ, Fleisher LA, Frick KD, *et al.* Lung cancer screening with helical computed tomography in older adult smokers: a decision and cost-effectiveness analysis. *Jama* 2003;289(3):313-22.
10. McCullagh P, Nelder JA. *Generalized Linear Models*. 2nd ed: London: Chapman & Hall/CRC; 1989.
11. Yao XI, Wang X, Speicher PJ, *et al.* Reporting and Guidelines in Propensity Score Analysis: A Systematic Review of Cancer and Cancer Surgical Studies. *J Natl Cancer Inst* 2017;109(8).
12. Hughes KS, Schnaper LA, Berry D, *et al.* Lumpectomy plus tamoxifen with or without irradiation in women 70 years of age or older with early breast cancer. *N Engl J Med* 2004;351(10):971-7.
13. Hughes KS, Schnaper LA, Bellon JR, *et al.* Lumpectomy plus tamoxifen with or without irradiation in women age 70 years or older with early breast cancer: long-term follow-up of CALGB 9343. *J Clin Oncol* 2013;31(19):2382-7.
14. Fisher B, Bryant J, Dignam JJ, *et al.* Tamoxifen, radiation therapy, or both for prevention of ipsilateral breast tumor recurrence after lumpectomy in women with invasive breast cancers of one centimeter or less. *J Clin Oncol* 2002;20(20):4141-9.
15. Fyles AW, McCready DR, Manchul LA, *et al.* Tamoxifen with or without breast irradiation in women 50 years of age or older with early breast cancer. *N Engl J Med* 2004;351(10):963-70.
16. Winzer KJ, Sauerbrei W, Braun M, *et al.* Radiation therapy and tamoxifen after breast-conserving surgery: updated results of a 2 x 2 randomised clinical trial in patients with low risk of recurrence. *Eur J Cancer* 2010;46(1):95-101.
17. Sparano JA, Gray RJ, Makower DF, *et al.* Prospective Validation of a 21-Gene Expression Assay in Breast Cancer. *New England Journal of Medicine* 2015;373(21):2005-2014.

18. Fisher B, Costantino J, Redmond C, *et al.* A Randomized Clinical Trial Evaluating Tamoxifen in the Treatment of Patients with Node-Negative Breast Cancer Who Have Estrogen-Receptor-Positive Tumors. *New England Journal of Medicine* 1989;320(8):479-484.
19. Fisher B, Dignam J, Wolmark N, *et al.* Tamoxifen and chemotherapy for lymph node-negative, estrogen receptor-positive breast cancer. *J Natl Cancer Inst* 1997;89(22):1673-82.
20. Fisher B, Carbone P, Economou SG, *et al.* L-Phenylalanine Mustard (L-PAM) in the Management of Primary Breast Cancer. *New England Journal of Medicine* 1975;292(3):117-122.
